# Supplementary material for: The impact of surfaces on indoor air chemistry following cooking and cleaning
Source: Royal Society of Chemistry journal article supplement (doi:10.1039/d4em00410h), 2024-09-13
Supplement: d4em00410h1.pdf [file d4em00410h1.pdf]

## SUPPLEMENTARY INFORMATION: The impact of indoor surfaces on indoor air chemistry following cooking and cleaning activities

Ellen Harding-Smith<sup>1,2</sup>, Helen L. Davies<sup>1</sup>, Catherine O'Leary<sup>2</sup>, Ruth Winkless<sup>2</sup>, Marvin Shaw<sup>3</sup>, Terry J. Dillon<sup>2</sup>, Benjamin Jones<sup>4</sup>, and Nicola Carslaw<sup>1,\*</sup>

<sup>1</sup>Department of Environment and Geography, University of York, United Kingdom

<sup>2</sup>Wolfson Atmospheric Chemistry Laboratories, Department of Chemistry, University of York, United Kingdom

<sup>3</sup>National Centre for Atmospheric Science, University of York, York, United Kingdom

<sup>4</sup>Department of Architecture and Built Environment, University of Nottingham, United Kingdom

\*Corresponding Email: [nicola.carslaw@york.ac.uk](mailto:nicola.carslaw@york.ac.uk)

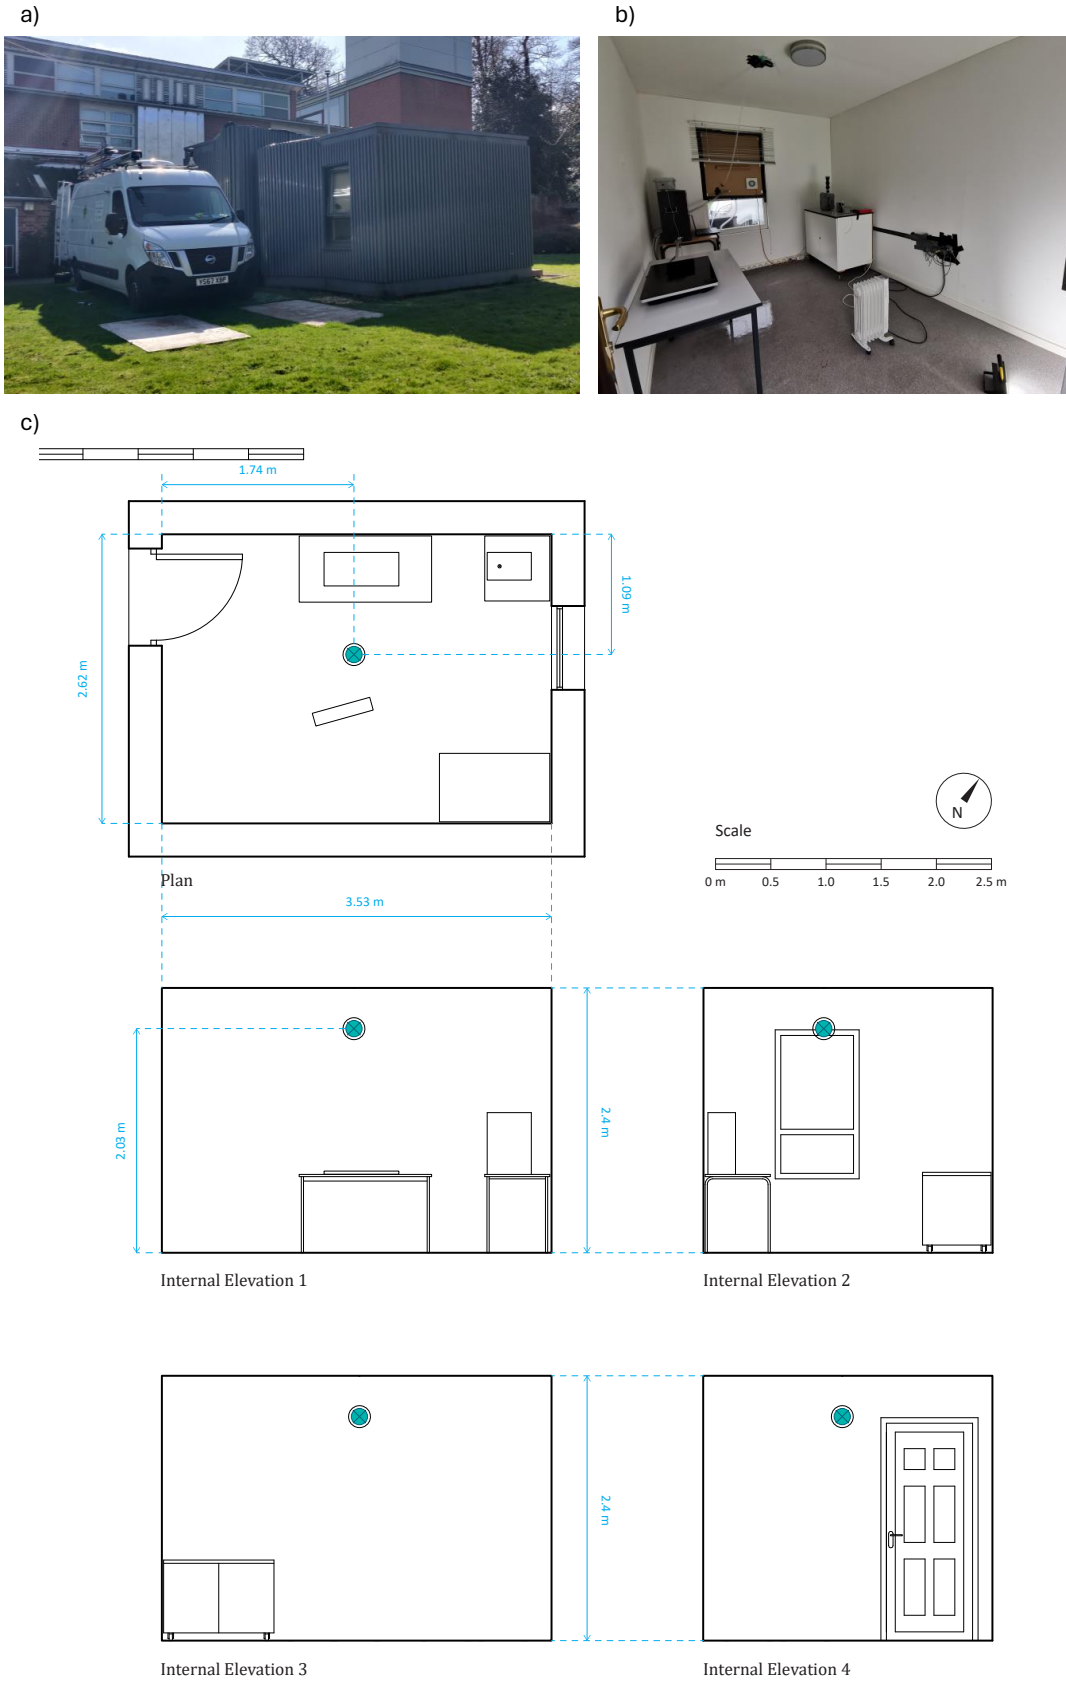

**Figure S1:** a) External view of experimental (Part L) pod and WACL Air Sampling Platform (WASP), b) Internal view of test pod, c) Floor plan and internal elevations of test pod. Sampling location denoted by blue circle.

# 1 SIFT-MS

The VOCs measured using each reagent ion in the SIFT-MS method are shown in Table S1, along with the species molecular weights, product ions, rate coefficients and branching ratios. Whether or not a particular product ion was used for quantification is also shown in the ‘Included in Analysis’ column.

Table S2 shows the species that were measured by SIFT-MS, their limits of detection (LOD), and whether or not the species are calibrated against a gas standard. The background concentrations of dihydromyrcenol and citral were not measured during the first two instrument calibrations of the campaign due to differences in the SIFT-MS selected ion monitoring (SIM) methods used. Therefore, the average background concentrations measured during the final four instrument calibrations for these species were assumed to be an appropriate estimation of the background concentrations at the start of the campaign and were subtracted from the data. The LODs for dihydromyrcenol and citral reported in Table S2 are an average of the final four instrument calibrations only. Lactic acid was not included in any SIM method used to perform calibration and zero air measurements throughout the campaign. Consequently, the instrument background was not corrected for this species, and no LOD was available.

**Table S1:** The compounds measured by SIFT-MS during cooking, cleaning, or both experiments using each reagent ion, and their corresponding product ion molecular masses (MM), chemical formulae, rate coefficients and branching ratios. Whether or not the product ion was used for quantification is also shown in the ‘included in analysis’ column.

| Reagent ion                   | Compound             | MM (g mol <sup>-1</sup> ) | Product ion                                                                        | Reaction rate ( $\times 10^{-9}$ cm <sup>3</sup> molecule <sup>-1</sup> s <sup>-1</sup> ) | Branching ratio (%) | Clean | Cook | Both | Included in analysis |
|-------------------------------|----------------------|---------------------------|------------------------------------------------------------------------------------|-------------------------------------------------------------------------------------------|---------------------|-------|------|------|----------------------|
| H <sub>3</sub> O <sup>+</sup> | 2,4-decadienal       | 153                       | C <sub>10</sub> H <sub>17</sub> O <sup>+</sup>                                     | 4.9                                                                                       | 100                 |       | ✓    |      |                      |
|                               |                      | 171                       | C <sub>10</sub> H <sub>17</sub> O <sup>+</sup> · H <sub>2</sub> O                  |                                                                                           |                     |       | ✓    |      |                      |
|                               | 2-phenethyl acetate  | 105                       | C <sub>8</sub> H <sub>9</sub> <sup>+</sup>                                         | 3.5                                                                                       | 80                  | ✓     |      |      | ✓                    |
|                               | acetaldehyde         | 45                        | C <sub>2</sub> H <sub>4</sub> O · H <sup>+</sup>                                   | 3.7                                                                                       | 100                 |       |      | ✓    | ✓                    |
|                               | acetonitrile         | 42                        | CH <sub>3</sub> CN · H <sup>+</sup>                                                | 5.1                                                                                       | 100                 |       |      | ✓    | ✓                    |
|                               |                      | 60                        | CH <sub>3</sub> CN · H <sup>+</sup> · H <sub>2</sub> O                             |                                                                                           |                     |       | ✓    |      |                      |
|                               | acrylamide           | 72                        | C <sub>2</sub> H <sub>3</sub> NH <sub>2</sub> CO · H <sup>+</sup>                  | 2.1                                                                                       | 100                 |       | ✓    |      | ✓                    |
|                               | benzoic acid         | 123                       | C <sub>7</sub> H <sub>6</sub> O <sub>2</sub> · H <sup>+</sup>                      | 3.0                                                                                       | 100                 |       | ✓    |      | ✓                    |
|                               | benzyl benzoate      | 151                       | C <sub>8</sub> H <sub>7</sub> O <sub>3</sub> <sup>+</sup>                          | 3.7                                                                                       | 60                  | ✓     |      |      |                      |
|                               |                      | 169                       | C <sub>8</sub> H <sub>7</sub> O <sub>3</sub> <sup>+</sup> · H <sub>2</sub> O       |                                                                                           |                     | ✓     |      |      |                      |
|                               | cinnamaldehyde       | 133                       | C <sub>9</sub> H <sub>8</sub> OH <sup>+</sup>                                      | 2.0                                                                                       | 100                 | ✓     |      |      |                      |
|                               | citral               | 153                       | C <sub>10</sub> H <sub>17</sub> O <sup>+</sup>                                     | 3.0                                                                                       | 60                  | ✓     |      |      | ✓                    |
|                               |                      | 171                       | C <sub>10</sub> H <sub>17</sub> O <sup>+</sup> · H <sub>2</sub> O                  |                                                                                           |                     | ✓     |      |      |                      |
|                               | decane               | 161                       | H <sub>3</sub> O <sup>+</sup> · C <sub>10</sub> H <sub>22</sub>                    | 1.6                                                                                       | 100                 |       | ✓    |      | ✓                    |
|                               | ethanol              | 47                        | C <sub>2</sub> H <sub>7</sub> O <sup>+</sup>                                       | 2.7                                                                                       | 100                 |       |      | ✓    | ✓                    |
|                               | formaldehyde         | 31                        | CH <sub>3</sub> O <sup>+</sup>                                                     | 3.4                                                                                       | 100                 |       |      | ✓    | ✓                    |
|                               | heptanal             | 115                       | C <sub>7</sub> H <sub>15</sub> O <sup>+</sup>                                      | 3.7                                                                                       | 80                  |       |      | ✓    | ✓                    |
|                               | hexanal              | 101                       | C <sub>6</sub> H <sub>13</sub> O <sup>+</sup>                                      | 3.7                                                                                       | 95                  |       | ✓    |      | ✓                    |
|                               |                      | 119                       | C <sub>6</sub> H <sub>13</sub> O <sup>+</sup> · H <sub>2</sub> O                   |                                                                                           |                     |       | ✓    |      |                      |
|                               |                      | 127                       | C <sub>6</sub> H <sub>6</sub> O <sub>3</sub> · H <sup>+</sup>                      |                                                                                           |                     | 4.0   | 100  |      | ✓                    |
|                               | maltol               | 145                       | C <sub>6</sub> H <sub>6</sub> O <sub>3</sub> · H <sub>3</sub> O <sup>+</sup>       | 2.7                                                                                       | 100                 |       | ✓    |      | ✓                    |
|                               |                      | 33                        | CH <sub>5</sub> O <sup>+</sup>                                                     |                                                                                           |                     |       | ✓    |      |                      |
|                               | methanol             | 163                       | C <sub>10</sub> H <sub>10</sub> O <sub>2</sub> · H <sup>+</sup>                    | 3.4                                                                                       | 100                 |       | ✓    |      | ✓                    |
|                               |                      | 181                       | C <sub>10</sub> H <sub>10</sub> O <sub>2</sub> · H <sup>+</sup> · H <sub>2</sub> O |                                                                                           |                     |       | ✓    |      |                      |
|                               | n-methylpyrrole      | 82                        | C <sub>5</sub> H <sub>7</sub> N · H <sup>+</sup>                                   | 3.0                                                                                       | 100                 |       | ✓    |      | ✓                    |
|                               | nonanal              | 143                       | C <sub>9</sub> H <sub>19</sub> O <sup>+</sup>                                      | 2.5                                                                                       | 86                  |       | ✓    |      | ✓                    |
|                               | octanal              | 129                       | C <sub>8</sub> H <sub>17</sub> O <sup>+</sup>                                      | 3.8                                                                                       | 85                  |       | ✓    |      | ✓                    |
|                               | pinonaldehyde        | 107                       |                                                                                    | 2.0                                                                                       | 33                  | ✓     |      |      | ✓                    |
|                               | propanal             | 59                        | C <sub>3</sub> H <sub>7</sub> O <sup>+</sup>                                       | 3.6                                                                                       | 100                 |       | ✓    |      | ✓                    |
|                               | total monoterpenes   | 137                       | C <sub>10</sub> H <sub>17</sub> <sup>+</sup>                                       | 2.6                                                                                       | 30                  |       |      | ✓    |                      |
|                               |                      | 155                       | C <sub>10</sub> H <sub>17</sub> · H <sub>2</sub> O <sup>+</sup>                    |                                                                                           |                     |       | ✓    |      |                      |
|                               | total sesquiterpenes | 205                       | C <sub>15</sub> H <sub>25</sub> <sup>+</sup>                                       | 2.5                                                                                       | 64                  |       |      | ✓    | ✓                    |
|                               | NO <sup>+</sup>      | 1,2,4-trimethylbenzene    | 120                                                                                | C <sub>9</sub> H <sub>12</sub> <sup>+</sup>                                               | 1.9                 | 100   |      | ✓    |                      |

|                                |     |                             |     |     |   |   |   |   |
|--------------------------------|-----|-----------------------------|-----|-----|---|---|---|---|
| 1-propanol                     | 59  | $C_3H_7O^+$                 | 0.6 | 100 |   | ✓ |   | ✓ |
|                                | 77  | $C_3H_7O \cdot H_2O^+$      |     |     |   | ✓ |   |   |
| 2,4-decadienal                 | 151 | $C_{10}H_{15}O^+$           | 4.2 | 80  |   | ✓ |   | ✓ |
| 2-heptenal                     | 111 | $C_7H_{11}O^+$              | 3.9 | 85  |   | ✓ |   | ✓ |
| 2-phenethyl acetate            | 104 | $C_8H_8^+$                  | 2.9 | 85  | ✓ |   |   |   |
| 2-tert-butylcyclohexyl acetate | 138 | $C_{10}H_{18}^+$            | 2.8 | 40  | ✓ |   |   | ✓ |
| acetaldehyde                   | 43  | $CH_3CO^+$                  | 0.7 | 80  | ✓ |   |   |   |
|                                | 61  | $CH_3CO^+ \cdot H_2O$       |     |     | ✓ |   |   |   |
| acetic acid                    | 90  | $NO^+ \cdot CH_3COOH$       | 0.9 | 100 |   |   | ✓ | ✓ |
| acetone                        | 88  | $NO^+ \cdot C_3H_6O$        | 1.0 | 100 |   | ✓ |   | ✓ |
| acrolein                       | 55  | $C_3H_3O^+$                 | 1.6 | 60  |   | ✓ |   | ✓ |
|                                | 86  | $C_3H_4O \cdot NO^+$        |     | 40  |   | ✓ |   |   |
| benzene                        | 78  | $C_6H_6^+$                  | 1.5 | 55  |   | ✓ |   | ✓ |
| benzoic acid                   | 105 | $C_7H_5O^+$                 | 3.0 | 60  |   | ✓ |   |   |
| benzyl benzoate                | 180 | $C_9H_{10}O_2NO^+$          | 2.5 | 45  | ✓ |   |   | ✓ |
| cinnamaldehyde                 | 132 | $C_9H_8O^+$                 | 2.0 | 100 |   |   | ✓ |   |
| cinnamyl acetate               | 176 | $C_{11}H_{12}O_2^+$         | 3.0 | 100 |   | ✓ |   | ✓ |
| citral                         | 151 | $C_{10}H_{15}O^+$           | 2.5 | 35  | ✓ |   |   |   |
| diallyl disulfide              | 146 | $(C_3H_5)_2S_2^+$           | 2.4 | 100 |   | ✓ |   | ✓ |
| dimethyl disulfide             | 94  | $(CH_3)_2S_2^+$             | 2.4 | 100 |   | ✓ |   | ✓ |
| ethanol                        | 45  | $C_2H_5O^+$                 | 1.2 | 100 | ✓ |   |   |   |
|                                | 63  | $C_2H_5O^+ \cdot H_2O$      |     |     | ✓ |   |   |   |
| eucalyptol                     | 154 | $C_{10}H_{18}O^+$           | 2.4 | 94  |   |   | ✓ | ✓ |
| eugenol                        | 164 | $C_{10}H_{12}O_2^+$         | 2.4 | 100 |   |   | ✓ | ✓ |
| furan                          | 68  | $C_4H_4O^+$                 | 1.7 | 100 |   | ✓ |   | ✓ |
| hexanal                        | 99  | $C_6H_{11}O^+$              | 2.5 | 100 |   | ✓ |   |   |
| lactic acid                    | 120 | $NO^+ \cdot C_3H_3OCOOH$    | 2.5 | 50  | ✓ |   |   | ✓ |
| maltol                         | 126 | $C_6H_6O_3^+$               | 2.5 | 100 |   | ✓ |   | ✓ |
| methyl cinnamate               | 162 | $C_{10}H_{10}O_2^+$         | 1.4 | 100 |   | ✓ |   |   |
|                                | 163 | $C_{10}H_{10}O_2 \cdot H^+$ |     |     |   | ✓ |   |   |
| toluene                        | 92  | $C_7H_8^+$                  | 2.2 | 100 |   | ✓ |   | ✓ |
| total monoterpenes             | 88  |                             | 2.2 | 25  | ✓ |   |   |   |
|                                | 136 | $C_{10}H_{16}^+$            | 2.2 | 75  |   |   | ✓ | ✓ |
| total sesquiterpenes           | 204 | $C_{15}H_{24}^+$            | 2.0 | 38  |   |   | ✓ |   |
| undecane                       | 155 | $C_{11}H_{23}^+$            | 3.8 | 84  |   | ✓ |   |   |
| xylene + ethylbenzene          | 106 | $C_8H_{10}^+$               | 2.0 | 100 |   | ✓ |   | ✓ |
| $O_2^+$                        |     |                             |     |     |   |   |   |   |
| 2-phenethyl acetate            | 104 | $C_8H_8^+$                  | 3.0 | 100 | ✓ |   |   |   |
| 2-tert-butylcyclohexyl acetate | 57  | $C_4H_9^+$                  | 4.5 | 45  | ✓ |   |   |   |
| cinnamaldehyde                 | 132 | $C_9H_8O^+$                 | 2.0 | 100 |   |   | ✓ | ✓ |
| cinnamyl acetate               | 134 | $C_9H_{10}O_2^+$            | 1.5 | 100 |   | ✓ |   |   |

|                     |     |                        |     |     |   |   |   |
|---------------------|-----|------------------------|-----|-----|---|---|---|
| dihydromyrcenol     | 59  | $C_3H_7O^+$            | 2.9 | 50  | ✓ |   | ✓ |
|                     | 77  | $C_3H_7O \cdot H_2O^+$ |     |     | ✓ |   |   |
| dimethyl sulfide    | 47  | $CH_3S^+$              | 2.2 | 25  |   | ✓ |   |
|                     | 62  | $(CH_3)_2S^+$          |     | 60  |   | ✓ | ✓ |
| dimethyl trisulfide | 111 | $CH_3S_3^+$            | 2.2 | 15  |   | ✓ | ✓ |
| eugenol             | 164 | $C_{10}H_{12}O_2^+$    | 1.9 | 100 |   |   | ✓ |
| furan               | 68  | $C_4H_4O^+$            | 1.6 | 100 |   | ✓ |   |
| maltol              | 126 | $C_6H_6O_3^+$          | 2.5 | 100 |   | ✓ |   |
| nonane              | 99  | $C_7H_{15}^+$          | 2.1 | 10  |   | ✓ | ✓ |
| octane              | 85  | $C_6H_{13}^+$          | 1.6 | 50  |   | ✓ | ✓ |
| undecane            | 156 | $C_{11}H_{24}^+$       | 3.2 | 31  |   | ✓ | ✓ |

**Table S2:** Species identified by SIFT-MS, their limits of detection (average  $\pm$  standard deviation), and whether or not their concentrations were calibrated against a gas standard

| Species                        | Average LOD (ppb) | Calibrated |
|--------------------------------|-------------------|------------|
| 1,2,4-trimethylbenzene         | 0.16 $\pm$ 0.1    |            |
| 1-propanol                     | 0.76 $\pm$ 0.1    |            |
| 2,4-decadienal                 | 0.07 $\pm$ 0.0    |            |
| 2-heptenal                     | 0.14 $\pm$ 0.0    |            |
| 2-phenethyl acetate            | 0.20 $\pm$ 0.1    |            |
| 2-tert-butylcyclohexyl acetate | 0.25 $\pm$ 0.1    |            |
| acetaldehyde                   | 1.41 $\pm$ 0.4    | ✓          |
| acetic acid                    | 0.61 $\pm$ 0.1    |            |
| acetone                        | 0.80 $\pm$ 0.1    | ✓          |
| acetonitrile                   | 0.70 $\pm$ 0.2    | ✓          |
| acrolein                       | 0.37 $\pm$ 0.1    |            |
| acrylamide                     | 0.18 $\pm$ 0.0    |            |
| benzene                        | 0.23 $\pm$ 0.0    |            |
| benzoic acid                   | 0.13 $\pm$ 0.0    |            |
| benzyl benzoate                | 0.44 $\pm$ 0.1    |            |
| cinnamaldehyde                 | 0.12 $\pm$ 0.0    |            |
| cinnamyl acetate               | 0.26 $\pm$ 0.1    |            |
| citral                         | 0.18 $\pm$ 0.1    |            |
| decane                         | 0.28 $\pm$ 0.1    |            |
| diallyl disulfide              | 0.11 $\pm$ 0.0    |            |
| dihydromyrcenol                | 1.70 $\pm$ 0.6    |            |
| dimethyl disulfide             | 0.20 $\pm$ 0.0    |            |
| dimethyl sulfide               | 0.46 $\pm$ 0.1    |            |
| ethanol                        | 5.88 $\pm$ 0.7    | ✓          |
| eucalyptol                     | 0.12 $\pm$ 0.0    |            |
| eugenol                        | 0.14 $\pm$ 0.0    |            |
| formaldehyde                   | 1.52 $\pm$ 0.3    |            |
| furan                          | 1.04 $\pm$ 0.2    | ✓          |
| heptanal                       | 0.22 $\pm$ 0.1    |            |
| hexanal                        | 0.39 $\pm$ 0.0    |            |
| maltol                         | 0.11 $\pm$ 0.0    |            |
| methanol                       | 8.22 $\pm$ 1.4    | ✓          |
| methyl cinnamate               | 0.20 $\pm$ 0.0    |            |
| n-methylpyrrole                | 0.07 $\pm$ 0.0    |            |
| nonanal                        | 0.31 $\pm$ 0.1    |            |
| nonane                         | 4.98 $\pm$ 0.9    |            |
| octanal                        | 0.22 $\pm$ 0.1    |            |
| octane                         | 1.20 $\pm$ 0.3    |            |
| pinonaldehyde                  | 0.34 $\pm$ 0.1    |            |
| propanal                       | 1.85 $\pm$ 0.3    |            |
| toluene                        | 0.52 $\pm$ 0.1    | ✓          |
| total monoterpenes             | 0.51 $\pm$ 0.2    | ✓          |
| total sesquiterpenes           | 1.50 $\pm$ 0.7    |            |
| undecane                       | 0.40 $\pm$ 0.2    |            |
| xylenes + ethylbenzene         | 0.15 $\pm$ 0.0    |            |

## 2 SIFT calibration and uncertainty

Calibration of the SIFT-MS was performed 6 times throughout the campaign using a custom-built automated gas calibration unit (AGCU). The AGCU was used to perform stepwise dilutions of calibrant gas, which were measured by the SIFT-MS to generate a multi-point calibration curve per compound. Two gas standards were used for SIFT-MS calibration: a 14-component gas standard (1 ppm certified National Physical Laboratory, UK) and a limonene only standard (1 ppm in N<sub>2</sub>). The limonene standard was prepared in-house by injecting a controlled amount of liquid standard (Sigma Aldrich, 99.8 % purity) into an evacuated gas cylinder and subsequently pressurising the cylinder with research-grade N<sub>2</sub> (N6, BOC). The resulting limonene concentration was determined via GC-FID (calibrated using 1 ppm limonene in N<sub>2</sub> standard, NPL) after 7 days equilibration at room temperature. Each gas standard was diluted in the AGCU using zero air which was provided by a heated palladium alumina-based zero air generator. The 14-component gas standard was diluted to a concentration range of 1 to 10 ppb, while the limonene gas standard was diluted to a range of 1.8 to 18 ppb. Each concentration step was measured for 3 minutes, with the first and last 30 seconds of each step being discounted to minimise the error associated with instrument equilibration between concentration steps. The resulting data was used to generate a multi-point calibration curve, from which the calibration factor was derived by linear regression analysis. The average and standard deviation of calibration factors determined from the 6 calibration runs during the campaign are shown in Table S3.

**Table S3:** Mean  $\pm$  standard deviation of the SIFT-MS calibration factors obtained during the Nottingham Pod campaign.

| Species                         | Average calibration factor $\pm$<br>standard deviation |
|---------------------------------|--------------------------------------------------------|
| acetaldehyde                    | 1.84 $\pm$ 0.01                                        |
| acetone                         | 0.72 $\pm$ 0.01                                        |
| acetonitrile                    | 2.94 $\pm$ 0.03                                        |
| ethanol                         | 0.94 $\pm$ 0.01                                        |
| furan                           | 0.84 $\pm$ 0.00                                        |
| total monoterpenes <sup>a</sup> | 1.28 $\pm$ 0.02                                        |
| methanol                        | 0.85 $\pm$ 0.01                                        |
| toluene                         | 1.15 $\pm$ 0.01                                        |

<sup>a</sup> Limonene used as calibration gas

For uncalibrated species, the SIFT-MS measurements were calculated using the ion-molecule reaction rate coefficients and branching ratios given in Table S1 (taken from Syft Technologies kinetic database). The uncertainty in these uncalibrated measurements is assumed to be  $\pm$  35 %, as recommended in Syft training resources<sup>1,2</sup>.



### 3 Air Change Rate

The air change rate in the test pod was measured 6 times during the campaign using methane tracer releases. The methane decays for each day is shown in Fig. S2a. The background methane concentration was subtracted from the calibrated methane concentration ( $C_t - C_b$ ), then the natural log was taken on the resulting concentration. After the release, the initial 10 minute mixing period was discounted, then a decay curve was fitted to the next 2 hour period, shown in Fig. S2b.

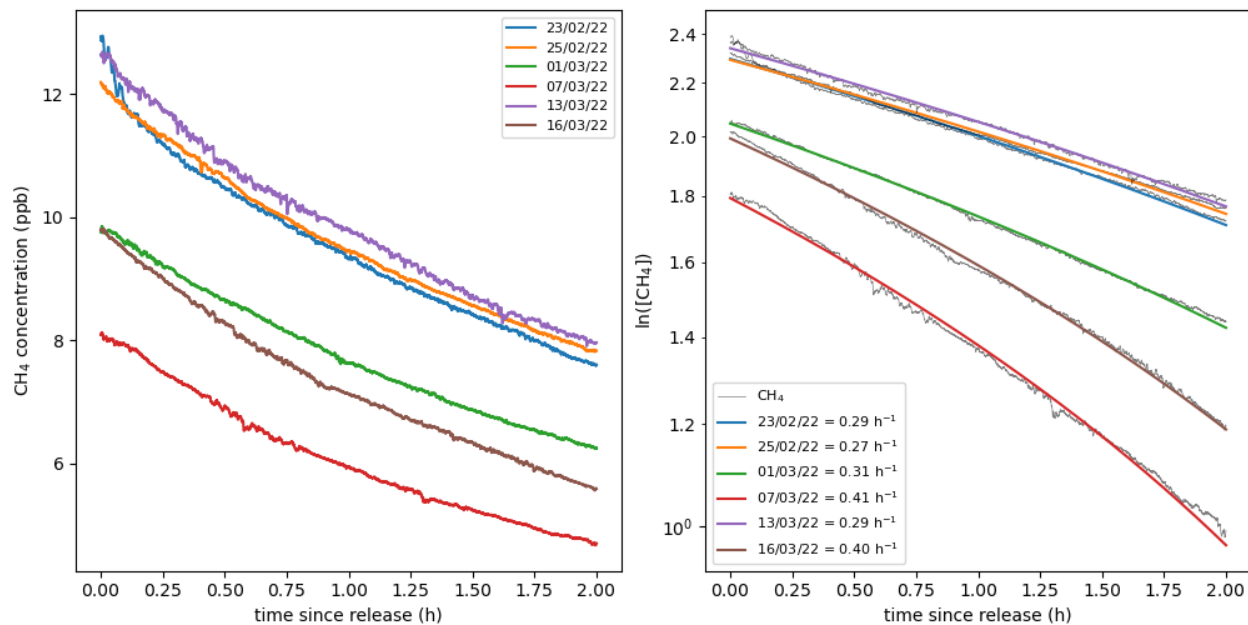

**Figure S2:** a) Concentration of methane over 2 hours following tracer release on 6 days during the campaign. b) Log-linear regression of the methane concentration decay, and the corresponding ACR for the 6 days.

## 4 VOC emission rates

The VOC emission rates input to INCHEM-Py are shown in Table S4 and S5 for the average cooking and cleaning activities occurring at 12:00 and 13:00, respectively. Emission rates were determined from SIFT-MS measurements, and calculated as the rate of increase in species concentrations during the cooking/cleaning activity. The total monoterpene emissions from the cleaning experiment were speciated using data from Harding-Smith *et al.*<sup>3</sup> for cleaner ‘SR1’, while those from the cooking experiment were speciated using data from Davies *et al.*<sup>4</sup>. Model emissions of butyl pyruvate were used as a proxy for measured emissions of 2-tert-butylcyclohexyl acetate, with mass correction. All emission rates were corrected to account for the difference between experimental and simulated room volumes.

**Table S4:** VOC emission rates determined from the averaged SIFT-MS measurements during the cooking experiment. For species where multiple gradients were observed in the emission peak, individual emission rates are reported as emission rates 1, 2 and 3. The time, in seconds from midnight, during which the emissions occurred is also shown for clarity.

| Species                    | $t_{start}$<br>(s) | $t_{end}$<br>(s) | Emission rate<br>1 (molecule<br>$\text{cm}^{-3} \text{s}^{-1}$ ) | $t_{start}$<br>(s) | $t_{end}$<br>(s) | Emission rate<br>2 (molecule<br>$\text{cm}^{-3} \text{s}^{-1}$ ) | $t_{start}$<br>(s) | $t_{end}$<br>(s) | Emission rate<br>3 (molecule<br>$\text{cm}^{-3} \text{s}^{-1}$ ) |
|----------------------------|--------------------|------------------|------------------------------------------------------------------|--------------------|------------------|------------------------------------------------------------------|--------------------|------------------|------------------------------------------------------------------|
| acetaldehyde               | 43230              | 43347            | $1.74 \times 10^9$                                               | 43615              | 43810            | $1.15 \times 10^9$                                               | 43808              | 43977            | $2.38 \times 10^8$                                               |
| hexanal                    | 43227              | 43351            | $4.27 \times 10^8$                                               | 43602              | 44011            | $3.70 \times 10^7$                                               | -                  | -                | -                                                                |
| methanol                   | 43653              | 43846            | $3.51 \times 10^{10}$                                            | -                  | -                | -                                                                | -                  | -                | -                                                                |
| ethanol                    | 43244              | 43351            | $1.39 \times 10^9$                                               | 43712              | 43794            | $6.50 \times 10^8$                                               | 43901              | 44015            | $8.22 \times 10^9$                                               |
| heptanal                   | 43271              | 43361            | $2.93 \times 10^8$                                               | 43729              | 43980            | $5.16 \times 10^7$                                               | -                  | -                | -                                                                |
| octanal                    | 43265              | 43419            | $1.36 \times 10^8$                                               | -                  | -                | -                                                                | -                  | -                | -                                                                |
| nonanal                    | 43313              | 43516            | $3.04 \times 10^8$                                               | -                  | -                | -                                                                | -                  | -                | -                                                                |
| acrolein                   | 43220              | 43323            | $1.22 \times 10^9$                                               | 43595              | 43925            | $7.71 \times 10^7$                                               | -                  | -                | -                                                                |
| limonene                   | 42587              | 42776            | $6.80 \times 10^7$                                               | 43609              | 43874            | $5.26 \times 10^7$                                               | -                  | -                | -                                                                |
| camphene                   | 42587              | 42776            | $2.38 \times 10^8$                                               | 43609              | 43874            | $1.84 \times 10^8$                                               | -                  | -                | -                                                                |
| $\alpha$ -pinene           | 42587              | 42776            | $7.18 \times 10^7$                                               | 43609              | 43874            | $5.55 \times 10^7$                                               | -                  | -                | -                                                                |
| 1,2,4-trimethyl<br>benzene | 43612              | 43812            | $1.45 \times 10^8$                                               | -                  | -                | -                                                                | -                  | -                | -                                                                |
| <i>n</i> -octane           | 43230              | 43323            | $1.60 \times 10^9$                                               | 43347              | 43984            | $1.54 \times 10^8$                                               | -                  | -                | -                                                                |
| <i>n</i> -nonane           | 43213              | 43326            | $2.61 \times 10^9$                                               | 43650              | 43849            | $1.79 \times 10^9$                                               | -                  | -                | -                                                                |
| dimethyl<br>sulphide       | 43216              | 43426            | $1.42 \times 10^8$                                               | 43622              | 43915            | $1.96 \times 10^8$                                               | -                  | -                | -                                                                |

**Table S5:** VOC emission rates determined from the averaged SIFT-MS measurements during the cleaning experiment. For species where multiple gradients were observed in the emission peak, individual emission rates are reported as emission rates 1, 2 and 3. The time, in seconds from midnight, during which the emissions occurred is also shown for clarity.

| Species                    | $t_{start}$<br>(s) | $t_{end}$<br>(s) | Emission rate<br>1 (molecule<br>$\text{cm}^{-3} \text{s}^{-1}$ ) | $t_{start}$<br>(s) | $t_{end}$<br>(s) | Emission rate<br>2 (molecule<br>$\text{cm}^{-3} \text{s}^{-1}$ ) | $t_{start}$<br>(s) | $t_{end}$<br>(s) | Emission rate<br>3 (molecule<br>$\text{cm}^{-3} \text{s}^{-1}$ ) |
|----------------------------|--------------------|------------------|------------------------------------------------------------------|--------------------|------------------|------------------------------------------------------------------|--------------------|------------------|------------------------------------------------------------------|
| acetaldehyde               | 46839              | 46982            | $1.46 \times 10^8$                                               |                    |                  |                                                                  |                    |                  |                                                                  |
| methanol                   | 46842              | 46956            | $1.34 \times 10^9$                                               |                    |                  |                                                                  |                    |                  |                                                                  |
| ethanol                    | 46840              | 46927            | $3.88 \times 10^8$                                               |                    |                  |                                                                  |                    |                  |                                                                  |
| limonene                   | 46806              | 46874            | $1.34 \times 10^7$                                               | 46874              | 46914            | $6.19 \times 10^7$                                               | 46874              | 46914            | $1.23 \times 10^7$                                               |
| carene                     | 46806              | 46874            | $3.41 \times 10^7$                                               | 46874              | 46914            | $1.57 \times 10^8$                                               | 46874              | 46914            | $3.13 \times 10^7$                                               |
| camphene                   | 46806              | 46874            | $3.66 \times 10^7$                                               | 46874              | 46914            | $1.69 \times 10^8$                                               | 46874              | 46914            | $3.35 \times 10^7$                                               |
| terpinolene                | 46806              | 46874            | $1.22 \times 10^6$                                               | 46874              | 46914            | $5.62 \times 10^6$                                               | 46874              | 46914            | $1.12 \times 10^6$                                               |
| $\alpha$ -pinene           | 46806              | 46874            | $3.54 \times 10^7$                                               | 46874              | 46914            | $1.63 \times 10^8$                                               | 46874              | 46914            | $3.24 \times 10^7$                                               |
| $\alpha$ -terpinene        | 46806              | 46874            | $1.22 \times 10^6$                                               | 46874              | 46914            | $5.62 \times 10^6$                                               | 46874              | 46914            | $1.12 \times 10^6$                                               |
| $\alpha$ -<br>phellandrene | 46806              | 46874            | $1.22 \times 10^6$                                               | 46874              | 46914            | $5.62 \times 10^6$                                               | 46874              | 46914            | $1.12 \times 10^6$                                               |
| butyl pyruvate             | 46835              | 47010            | $1.57 \times 10^7$                                               |                    |                  |                                                                  |                    |                  |                                                                  |
| dihydromyrcenol            | 46789              | 47090            | $1.07 \times 10^8$                                               |                    |                  |                                                                  |                    |                  |                                                                  |

## 5 Correlations between surface materials and surface-emitted species

Figures S3 and S4 shows the correlations between the surface areas of wooden, soft, painted and plastic surfaces surfaces, and the corresponding background concentrations of surface-emitted species with a CV > 0.2 (Table 2, main text), in each of the 20 kitchen permutations.

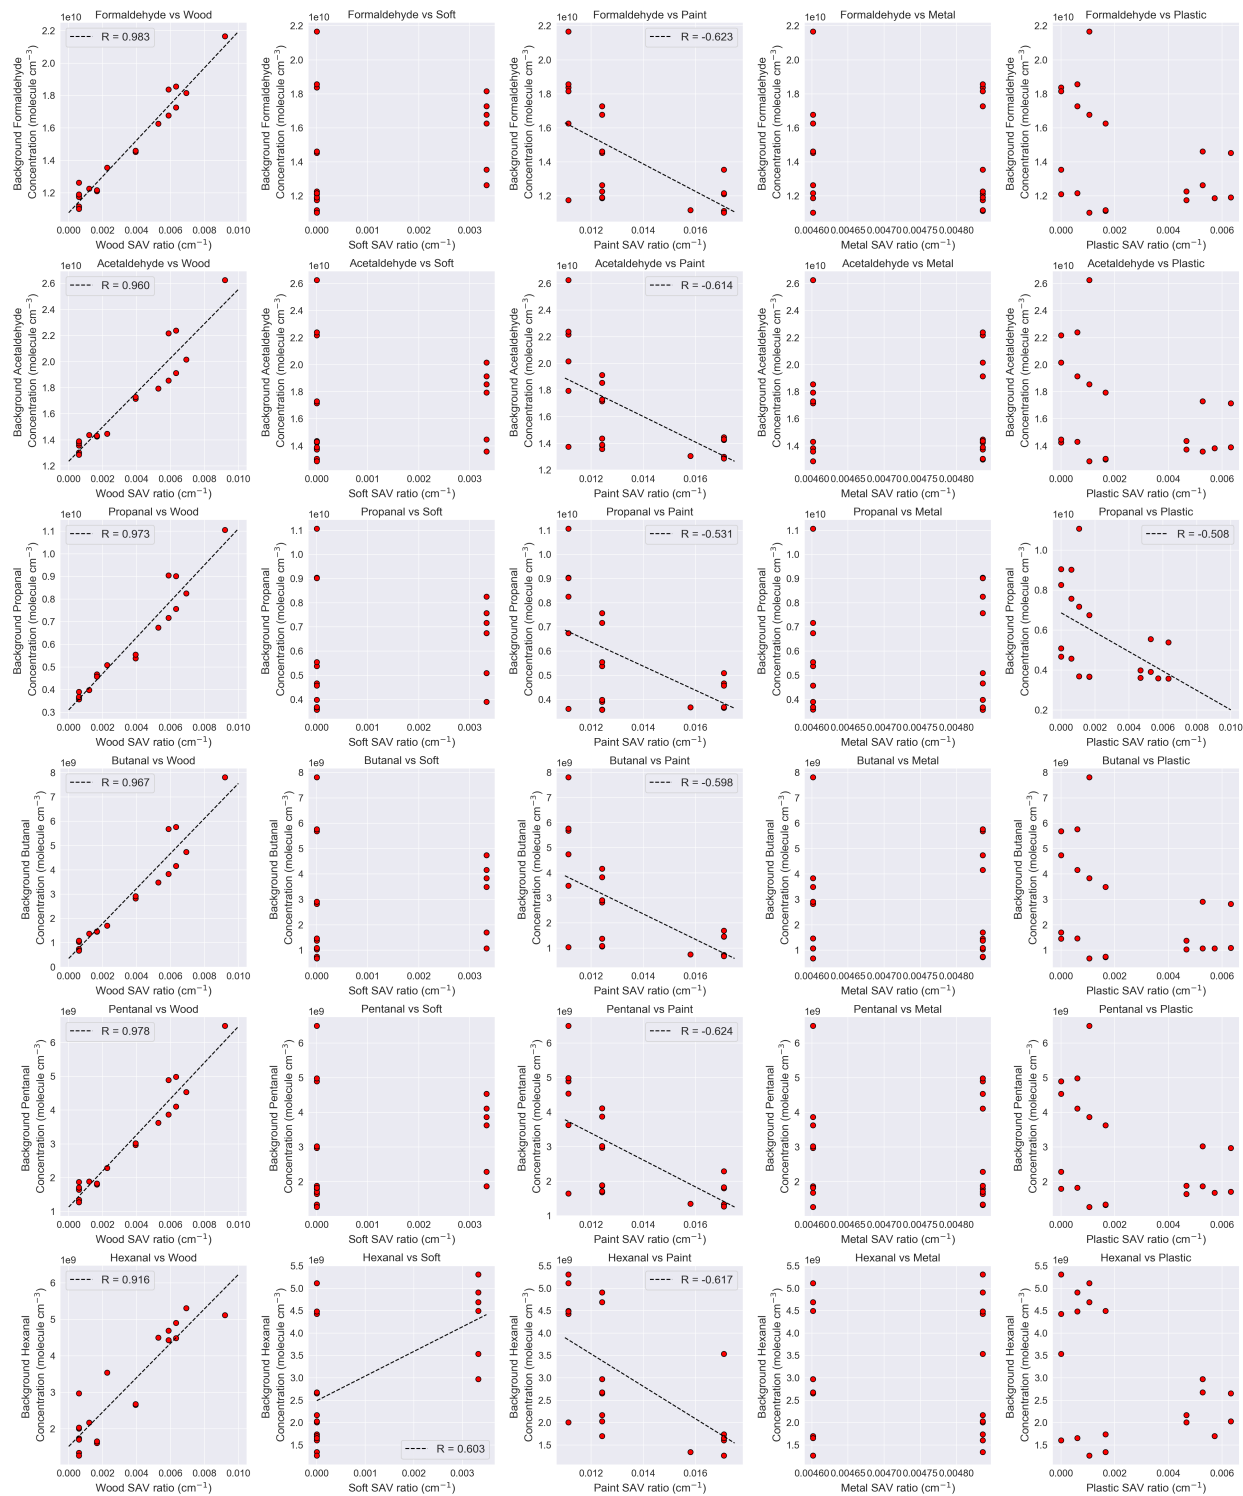

**Figure S3:** Relationship between the surface area to volume ratios of wooded, soft, painted, metal and plastic surfaces (columns) and the background concentrations (averaged between noon and midnight) of formaldehyde, acetaldehyde, propanal, butanal, pentanal and hexanal (rows), where each point is one of the 20 kitchen permutations. Pearson correlation coefficients (R) are plotted and shown when  $R > 0.5$ , and when the correlations are statistically significant ( $p < 0.05$ ).

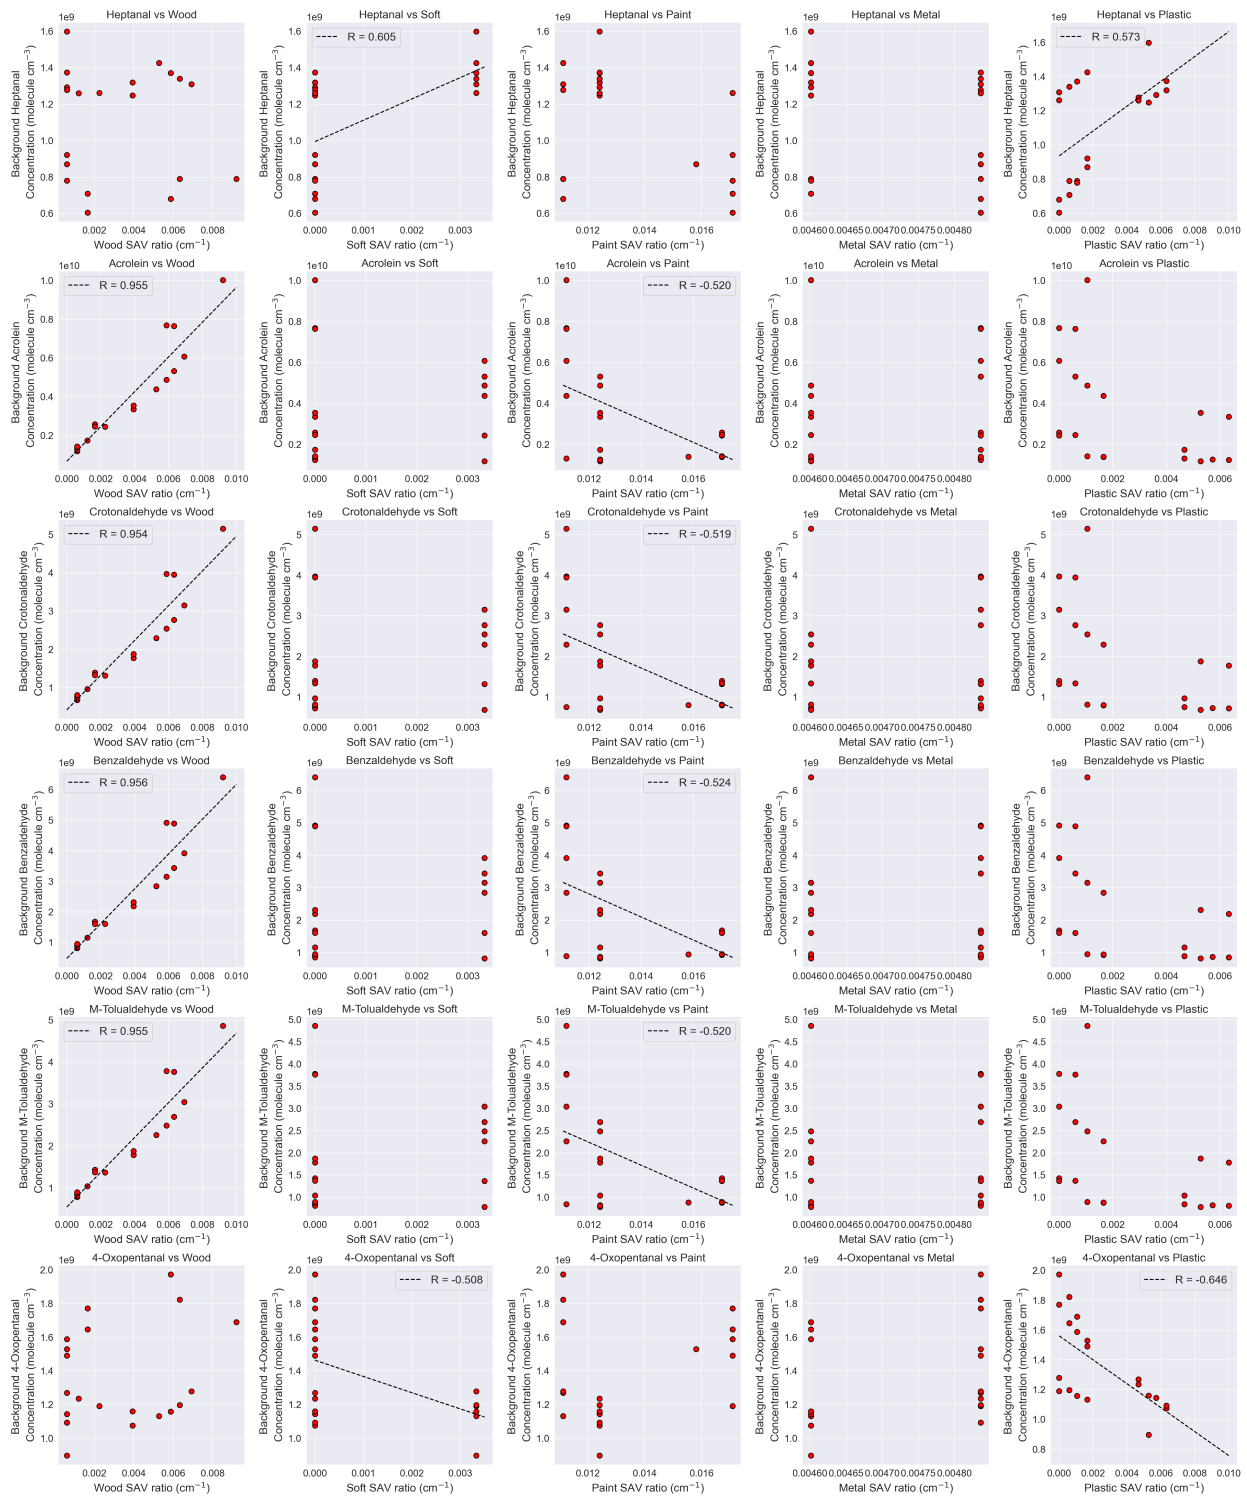

**Figure S4:** Relationship between the surface area to volume ratios of wooden, soft, painted, metal and plastic surfaces (columns) and the background concentrations (averaged between noon and midnight) of heptanal, acrolein, crotonaldehyde, benzaldehyde, m-tolualdehyde and 4-oxopentanal (rows), where each point is one of the 20 kitchen permutations. Pearson correlation coefficients ( $R$ ) are plotted and shown when  $R > 0.5$ , and when the correlations are statistically significant ( $p < 0.05$ ).

## 6 References

- [1] Syft Technologies. (2014). Quantitation: SIFT-MS Calibration Principles. Syft Technologies Training Materials.
- [2] Langford, V. S. and G. I. and M. M. J. (2014). Rapid monitoring of volatile organic compounds: a comparison between gas chromatography/mass spectrometry and selected ion flow tube mass spectrometry. *Rapid Communications in Mass Spectrometry*, 28(1), 10–18. <https://doi.org/10.1002/rcm.6747>
- [3] Harding-Smith, E., Shaw, D. R., Shaw, M., Dillon, T. J., & Carslaw, N. (2024). Does green mean clean? Volatile organic emissions from regular versus green cleaning products. *Environmental Science: Processes & Impacts*, 26(2), 436–450. <https://doi.org/10.1039/D3EM00439B>
- [4] Davies, H. L., O’Leary, C., Dillon, T., Shaw, D. R., Shaw, M., Mehra, A., Phillips, G., & Carslaw, N. (2023). A measurement and modelling investigation of the indoor air chemistry following cooking activities. *Environmental Science: Processes & Impacts*, 25(9), 1532–1548. <https://doi.org/10.1039/D3EM00167A>
